# Supplementary material for: A green and fast strategy for the scalable synthesis of Fe2O3/graphene with significantly enhanced Li-ion storage properties
Source: Royal Society of Chemistry journal article supplement (doi:10.1039/c2jm15927a), 2012-01-01
Supplement: c2jm15927a.pdf [file c2jm15927a.pdf]

## **A green and fast strategy for the scalable synthesis of Fe<sub>2</sub>O<sub>3</sub>/graphene with significantly enhanced Li-ion storage properties**

Ming Zhang, Baihua Qu, Danni Lei, Yuejiao Chen, Xinzhi Yu, Libao Chen, Qihong  
Li, Yanguo Wang and Taihong Wang\*

*Key Laboratory for Micro-Nano Optoelectronic Devices of Ministry of Education and  
State Key Laboratory for Chemo/Biosensing and Chemometrics, Hunan University,  
Changsha 410082, China*

---

\* To whom correspondence should be addressed. E-mail: [thwang@iphy.ac.cn](mailto:thwang@iphy.ac.cn)

## I Experimental Section

Graphene oxide (GO) was prepared from graphite powders according to a modified Hummers' method.<sup>1</sup> The detail procedures were the same as our published studies.<sup>2-4</sup>

**Synthesis of HGs (commercial hematite/graphene )** The GO was mixed with commercial Fe<sub>2</sub>O<sub>3</sub> with a weight rate of 8:2 by sonicating. Then, 1 mL N<sub>2</sub>H<sub>4</sub>·H<sub>2</sub>O was added in and the mixture was refluxed for 15 min with a microwave heater. Thirdly, the resulting products were collected by centrifugation, washed repeatedly with deionized water and dried under vacuum at 353 K for 24 h. Finally, HGs were achieved by treating the dry products at 493 K in Ar atmosphere to remove the impurities. The oxygen-containing groups were removed during the reduction procedures, therefore the weight ratio of Fe<sub>2</sub>O<sub>3</sub> to graphene in HGs was about 8.4:1.6, which was similar to that of HGCs.

## References

1. N. I. Kovtyukhova, P. J. Ollivier, B. R. Martin, T. E. Mallouk, S. A. Chizhik, E. V. Buzaneva and A. D. Gorchinskiy, *Chem. Mater.*, 1999, **11**, 771.
2. M. Zhang, D. N. Lei, Z. F. Du, X. M. Yin, L. B. Chen, Q. H. Li, Y. G. Wang and T. H. Wang, *J. Mater. Chem.*, 2011, **21**, 1673.
3. M. Zhang, D. N. Lei, X. M. Yin, L. B. Chen, Q. H. Li, Y. G. Wang and T. H. Wang, *J. Mater. Chem.*, 2010, **20**, 5538.
4. M. Zhang, S. Liu, X. M. Yin, Z. F. Du, Q. Y. Hao, D. N. Lei, Q. H. Li and T. H. Wang, *Chem. Asian J.*, 2011, **6**, 1151.

## II Synthesizing HGCs at Large Scale

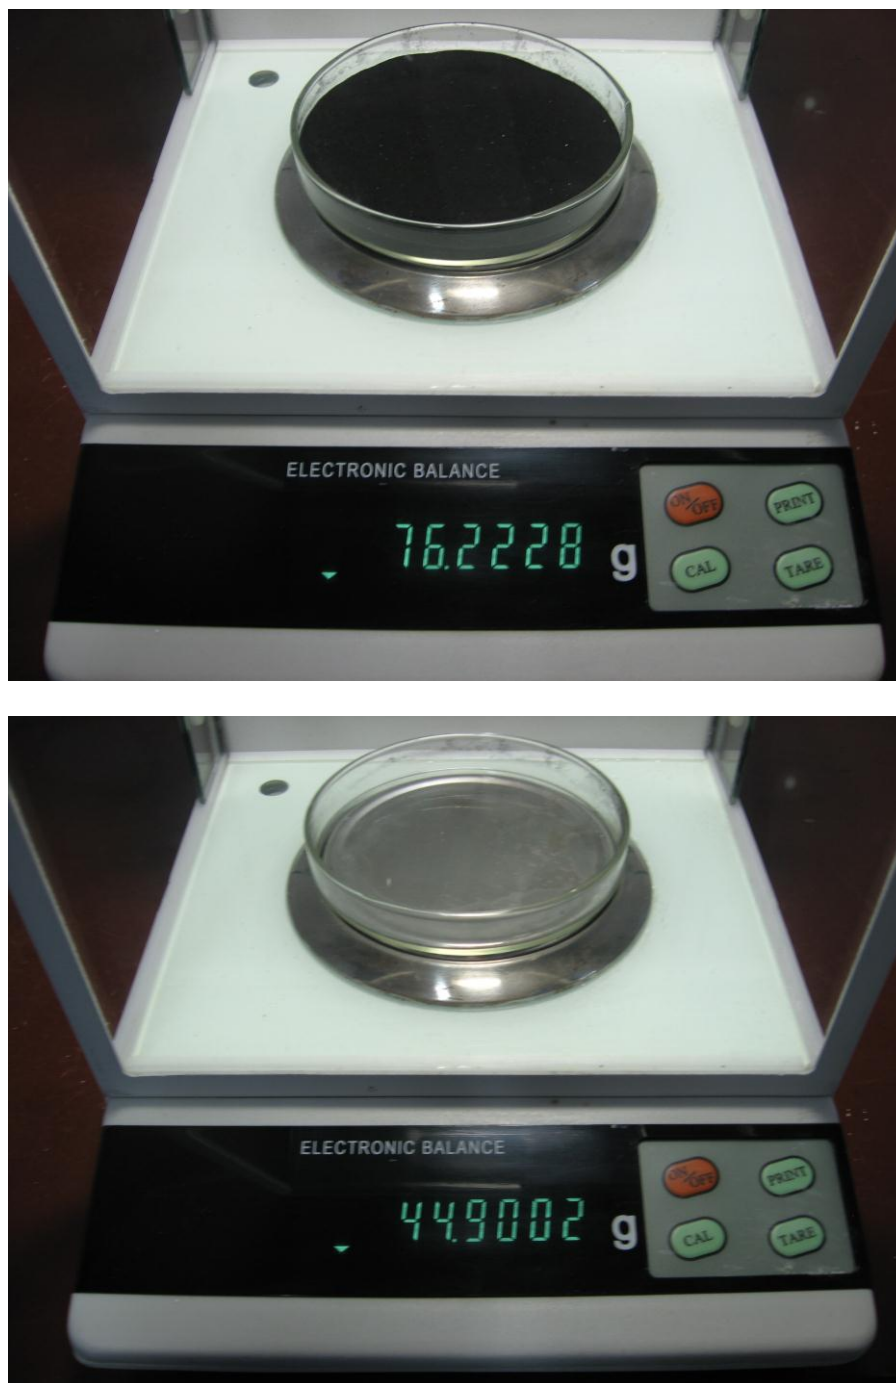

Figure S1. The weight of HGCs which could be prepared by a large reactor.

### III FESEM Images of Anode Materials on Copper Foils

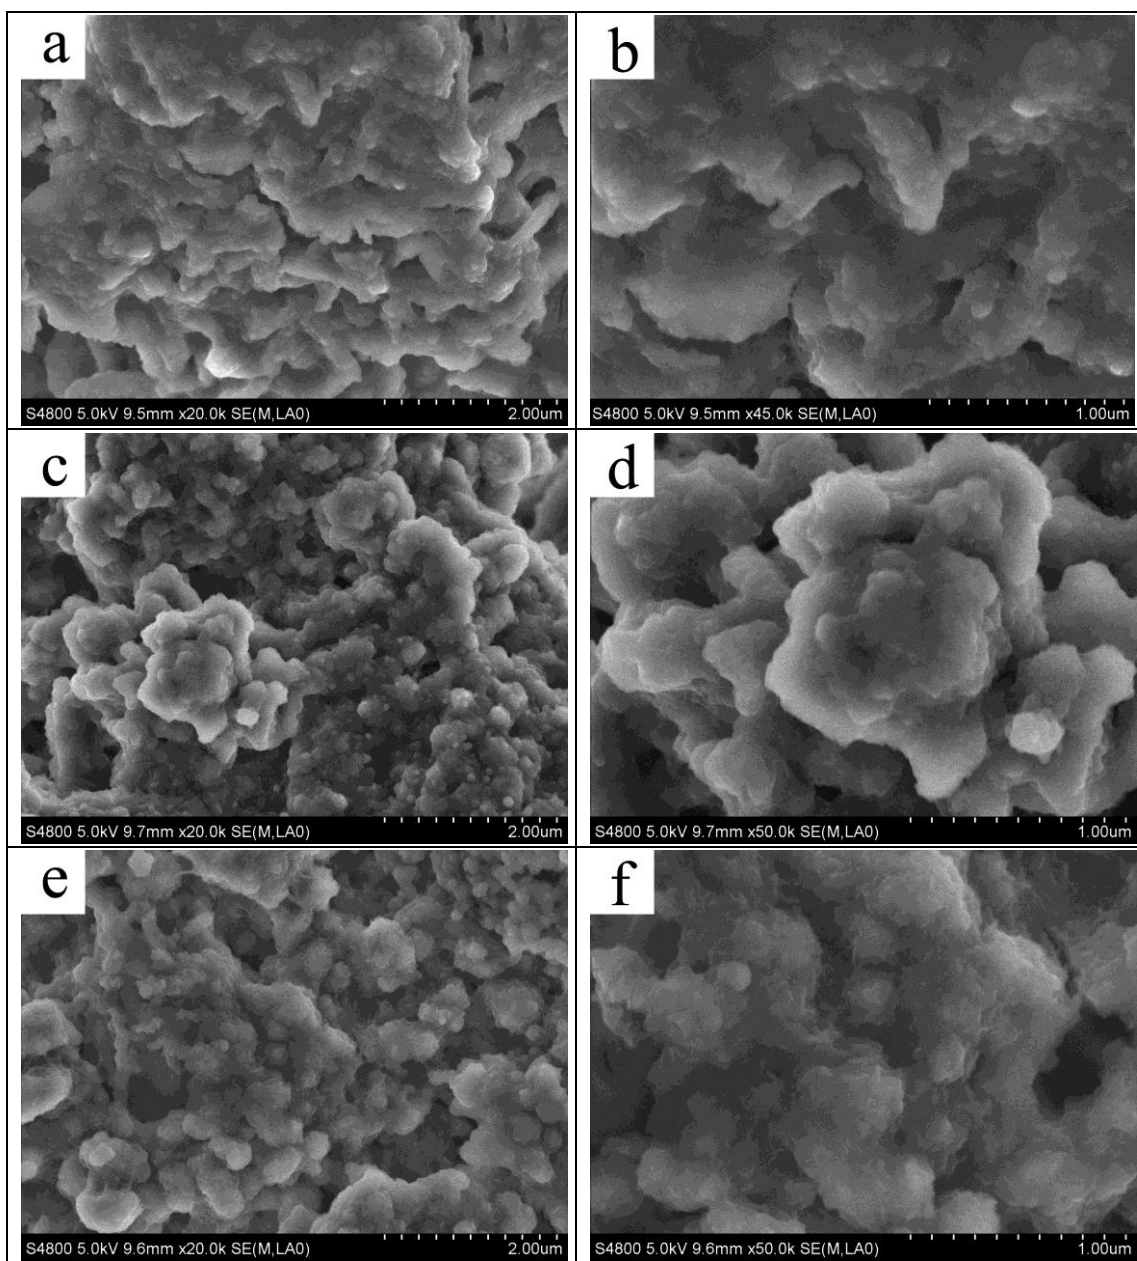

Figure S2. FESEM images of HGCs (a, b), HGs (c, d) and CHs (e, f) on copper foils after 100 cycles.
